# Supplementary material for: Synergetic FeCo nanorods embedded in nitrogen-doped carbon nanotubes with abundant metal–NCNT heterointerfaces as efficient air electrocatalysts for rechargeable zinc–air batteries
Source: Royal Society of Chemistry journal article supplement (doi:10.1039/d0se01023e), 2020-01-01
Supplement: d0se01023e1.pdf [file d0se01023e1.pdf]

## Supporting information

for

### **Synergetic FeCo nanorods embedded in nitrogen doped carbon nanotubes with abundant metal-NCNT heterointerfaces as efficient air electrocatalyst for rechargeable zinc-air batteries**

Hao Hu<sup>a#</sup>, Yuhua Xie<sup>a#</sup>, Farhad MD Kazim<sup>a</sup>, Konggang Qu<sup>b</sup>, Min Li<sup>a</sup>, Zhikun Xu<sup>c,d\*</sup> and Zehui Yang<sup>a\*</sup>

<sup>a</sup>Sustainable Energy Laboratory, Faculty of Materials Science and Chemistry, China University of Geosciences Wuhan, 388 Lumo RD, Wuhan, 430074, China

<sup>b</sup>Shandong Provincial Key Laboratory/Collaborative Innovation Center of Chemical Energy Storage & Novel Cell Technology, Liaocheng University, Liaocheng, 252059, China

<sup>c</sup>Key Laboratory for Photonic and Electronic Bandgap Materials, Ministry of Education, School of Physics and Electronic Engineering, Harbin Normal University, Harbin 150025, China.

<sup>d</sup>College of Science, Guangdong University of Petrochemical Technology,, Maoming, 525000, China.

H. Hu and Y. Xie equally contributed to this work.

**Table S1** Quantitative analysis of N1s peaks of various electrocatalysts.

| Electrocatalyst                                | pyridinic N | pyrrolic N | graphitic N | oxidized N |
|------------------------------------------------|-------------|------------|-------------|------------|
| Fe-NR/NCNT                                     | 30.72       | 21.60      | 29.76       | 17.92      |
| Co-NR/NCNT                                     | 28.31       | 21.51      | 29.02       | 21.16      |
| Fe <sub>0.67</sub> Co <sub>0.33</sub> -NR/NCNT | 30.33       | 22.24      | 28.08       | 19.35      |
| Fe <sub>0.5</sub> Co <sub>0.5</sub> -NR/NCNT   | 31.72       | 22.15      | 31.61       | 18.52      |
| Fe <sub>0.33</sub> Co <sub>0.67</sub> -NR/NCNT | 34.49       | 23.57      | 30.38       | 11.56      |

**Table S2** Quantitative analysis of Fe2p and Co2p peaks of various electrocatalysts.

| Electrocatalyst                                | Fe <sup>0</sup> :Fe <sup>x+</sup> | Co <sup>0</sup> :Co <sup>x+</sup> |
|------------------------------------------------|-----------------------------------|-----------------------------------|
| Fe-NR/NCNT                                     | 1.98:1                            | -                                 |
| Co-NR/NCNT                                     | -                                 | 4.17:1                            |
| Fe <sub>0.67</sub> Co <sub>0.33</sub> -NR/NCNT | 1.76:1                            | 1.92:1                            |
| Fe <sub>0.5</sub> Co <sub>0.5</sub> -NR/NCNT   | 1.79:1                            | 1.90:1                            |
| Fe <sub>0.33</sub> Co <sub>0.67</sub> -NR/NCNT | 1.82:1                            | 1.83:1                            |

**Table S3** Comparison of power densities of rechargeable zinc-air batteries based on Fe/Co electrocatalysts.

| <b>Electrocatalyst</b>                       | <b>Power density (mW cm<sup>-2</sup>)</b> | <b>Ref.</b> |
|----------------------------------------------|-------------------------------------------|-------------|
| Fe <sub>0.5</sub> Co <sub>0.5</sub> -NR/NCNT | 164                                       | This work   |
| FeCo-Nx-CN                                   | 150                                       | 1           |
| CoFe@NCNTs                                   | 150                                       | 2           |
| Co <sub>2</sub> FeO <sub>4</sub> /NCNTs      | 90.68                                     | 3           |
| CoFe/N-GCT                                   | 203                                       | 4           |
| FeNi@N-CNT/NCSs                              | 103                                       | 5           |
| D-BNGFe                                      | 142                                       | 6           |
| Mn/Co-N-C                                    | 136                                       | 7           |
| CoFe/Co@NCNT/NG                              | 161                                       | 8           |
| Co-N-C nanosheet                             | 132                                       | 9           |

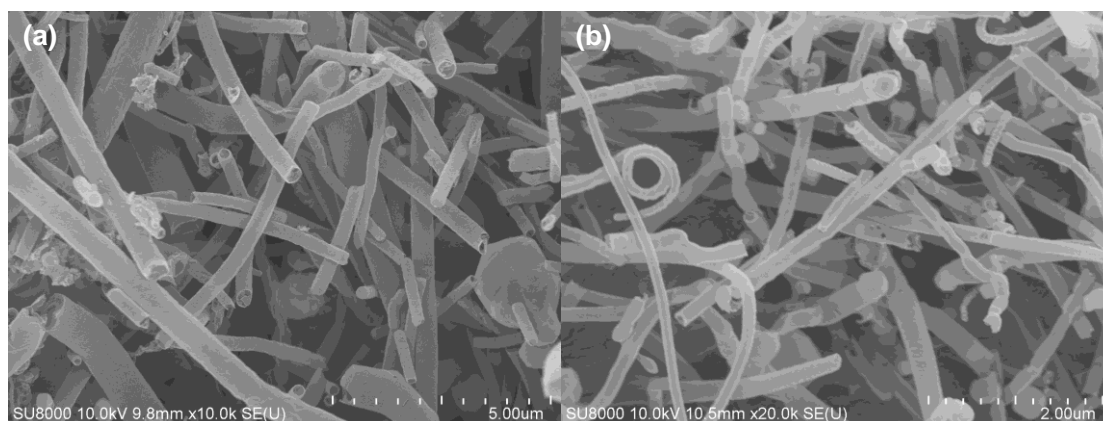

**Figure S1** SEM images of  $\text{Fe}_{0.67}\text{Co}_{0.33}\text{-NR/NCNT}$  (a) and  $\text{Fe}_{0.5}\text{Co}_{0.5}\text{-NR/NCNT}$

(b) electrocatalysts.

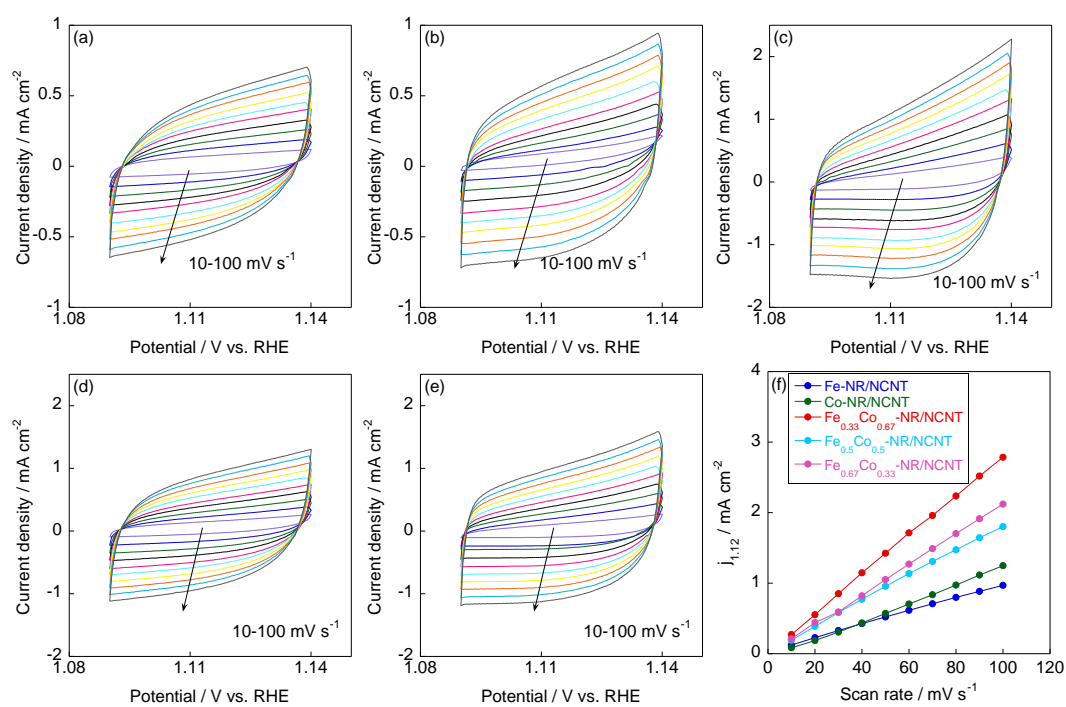

**Figure S2** Cyclic voltammetry curves of Fe-NR/NCNT (a), Co-NR/NCNT (b),

$\text{Fe}_{0.33}\text{Co}_{0.67}\text{-NR/NCNT}$  (c),  $\text{Fe}_{0.5}\text{Co}_{0.5}\text{-NR/NCNT}$  (d) and  $\text{Fe}_{0.67}\text{Co}_{0.33}\text{-NR/NCNT}$

(e) electrocatalysts. (f) ECSAs of Fe-NR/NCNT, Co-NR/NCNT,

$\text{Fe}_{0.67}\text{Co}_{0.33}\text{-NR/NCNT}$ ,  $\text{Fe}_{0.5}\text{Co}_{0.5}\text{-NR/NCNT}$  and  $\text{Fe}_{0.33}\text{Co}_{0.67}\text{-NR/NCNT}$

electrocatalysts.



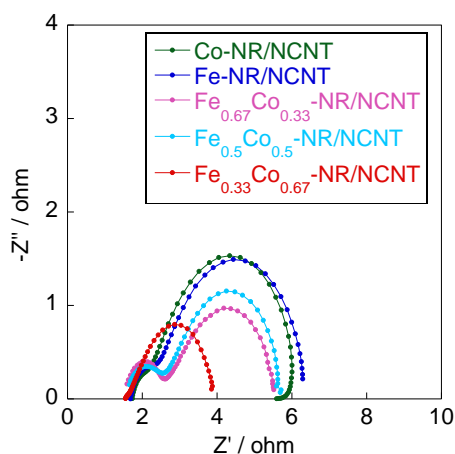

**Figure S3** Electrochemical impedance spectroscopies (EIS) of Fe-NR/NCNT, Co-NR/NCNT,  $\text{Fe}_{0.67}\text{Co}_{0.33}$ -NR/NCNT,  $\text{Fe}_{0.5}\text{Co}_{0.5}$ -NR/NCNT and  $\text{Fe}_{0.33}\text{Co}_{0.67}$ -NR/NCNT electrocatalysts.

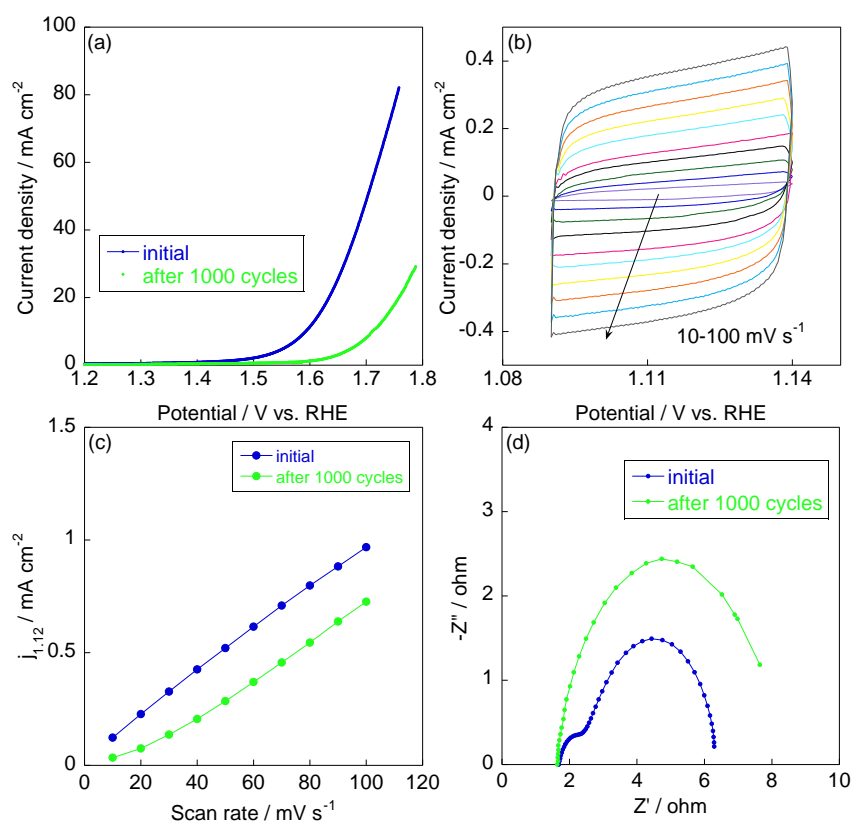

**Figure S4** OER performance (a), cyclic voltammety curve (b), ECSA (c) and electrochemical impedance spectroscopies (d) of Fe-NR/NCNT before and after 1000 potential cycles.

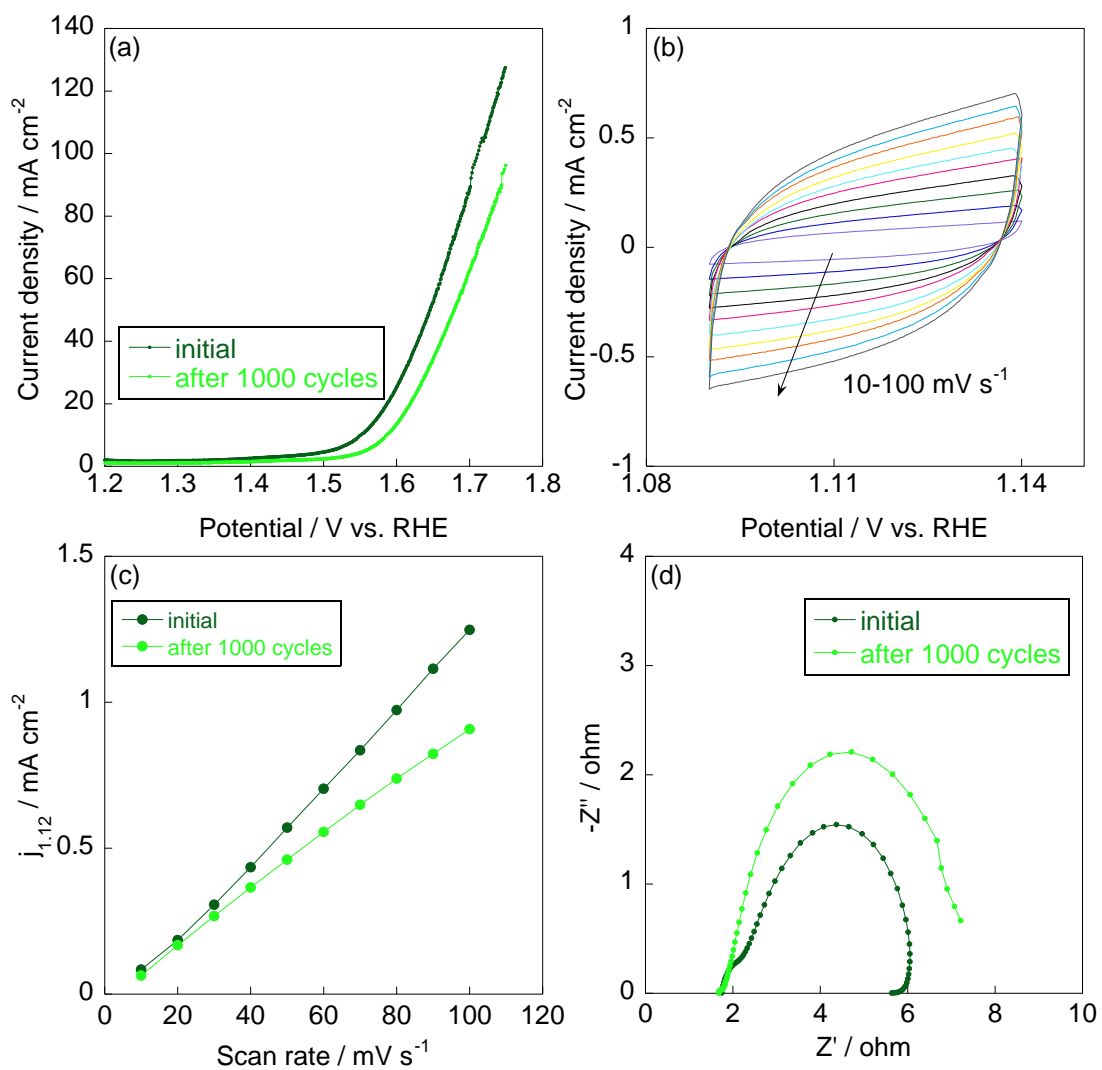

**Figure S5** OER performance (a), cyclic voltammety curve (b), ECSA (c) and electrochemical impedance spectroscopies (d) of Co-NR/NCNT before and after 1000 potential cycles.

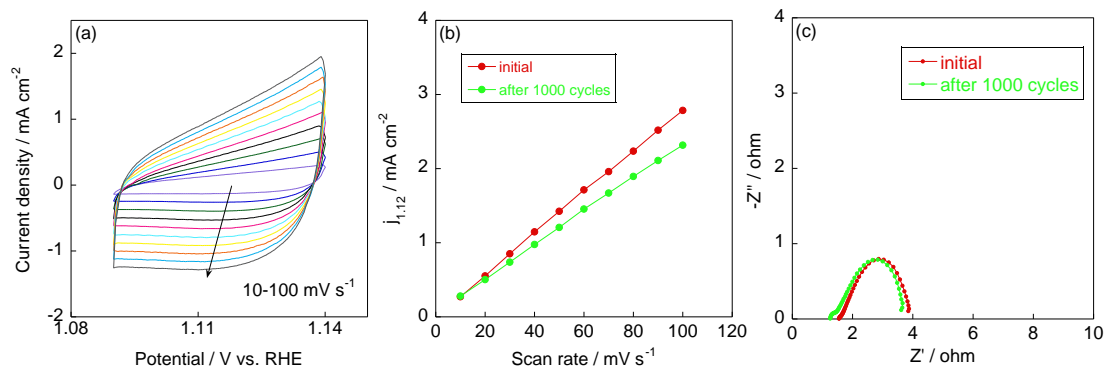

**Figure S6** Cyclic voltammetry curve (a), ECSA (b) and electrochemical impedance spectroscopies (c) of Fe<sub>0.33</sub>Co<sub>0.67</sub>-NR/NCNT before and after 1000 potential cycles.

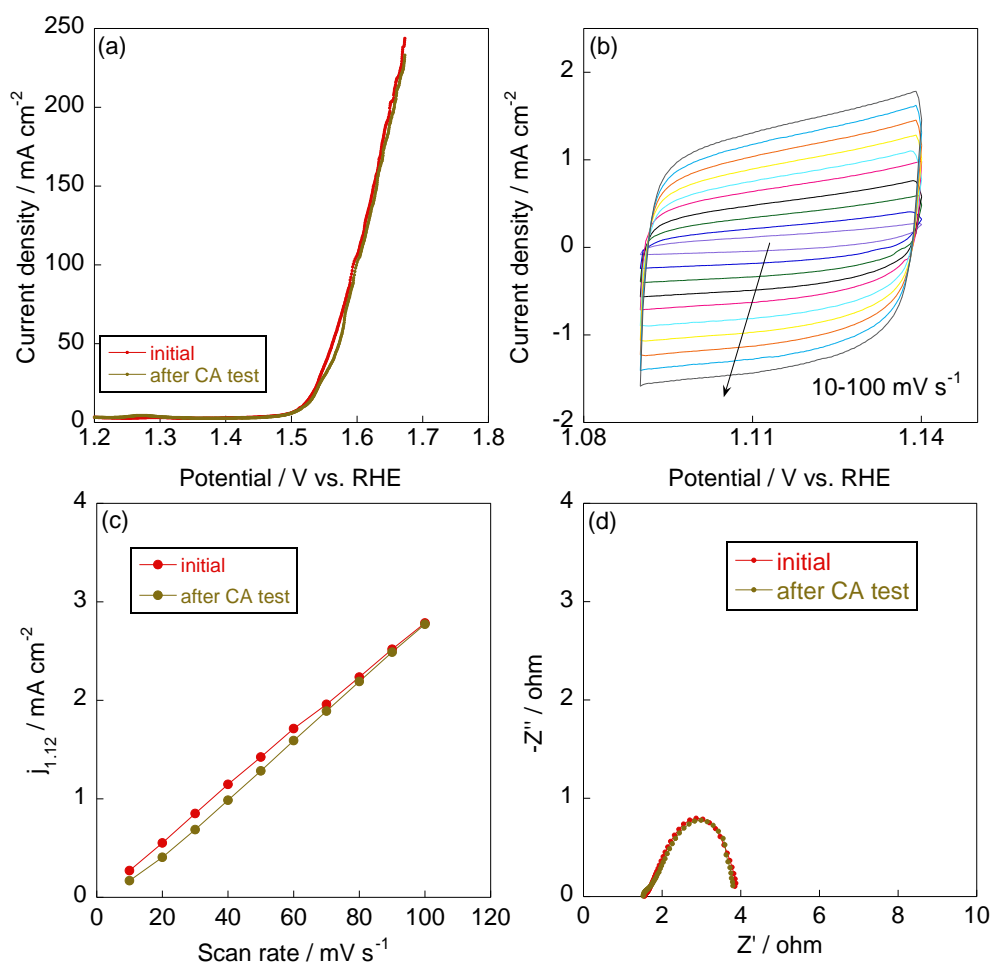

**Figure S7** OER performance (a), cyclic voltammetry curve (b), ECSA (c) and electrochemical impedance spectroscopies (d) of Fe<sub>0.33</sub>Co<sub>0.67</sub>-NR/NCNT before and after 1000 potential cycles.

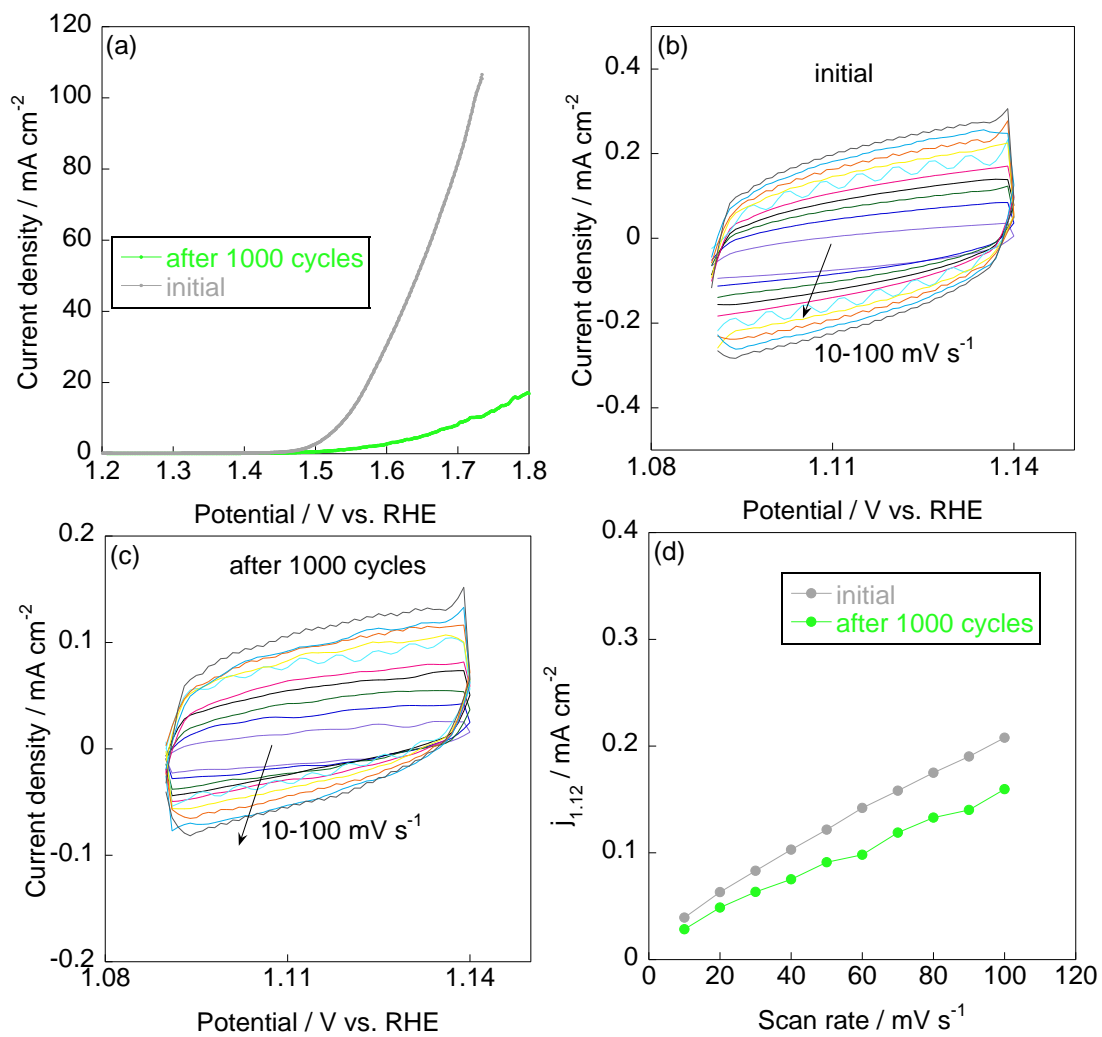

**Figure S8** OER performance (a), cyclic voltammety curves (b, c) and ECSAs (d) of commercial  $\text{IrO}_2$  before and after 1000 potential cycles.

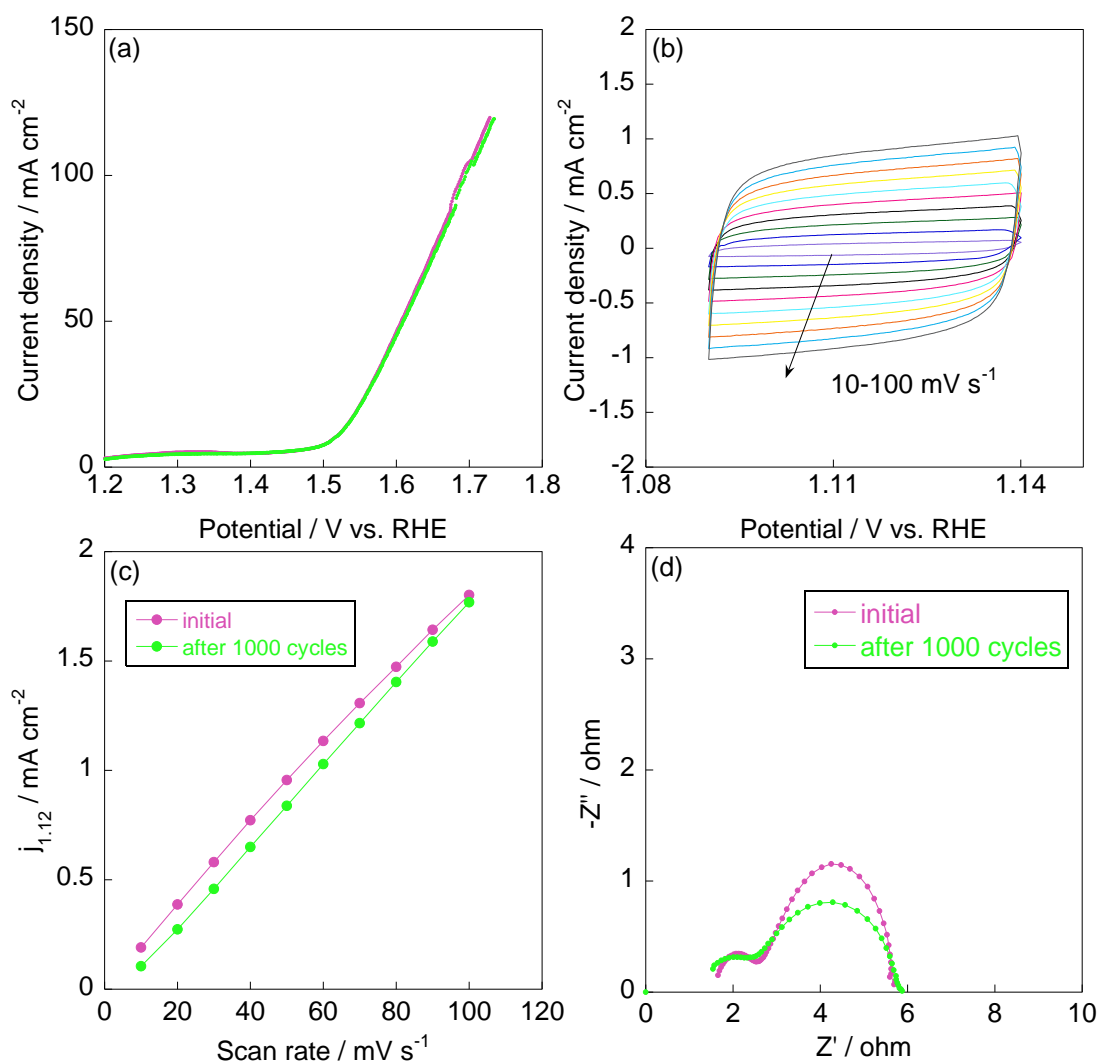

**Figure S9** OER performance (a), cyclic voltammetry curve (b), ECSA (c) and electrochemical impedance spectroscopies (d) of  $\text{Fe}_{0.5}\text{Co}_{0.5}\text{-NR/NCNT}$  before and after 1000 potential cycles.

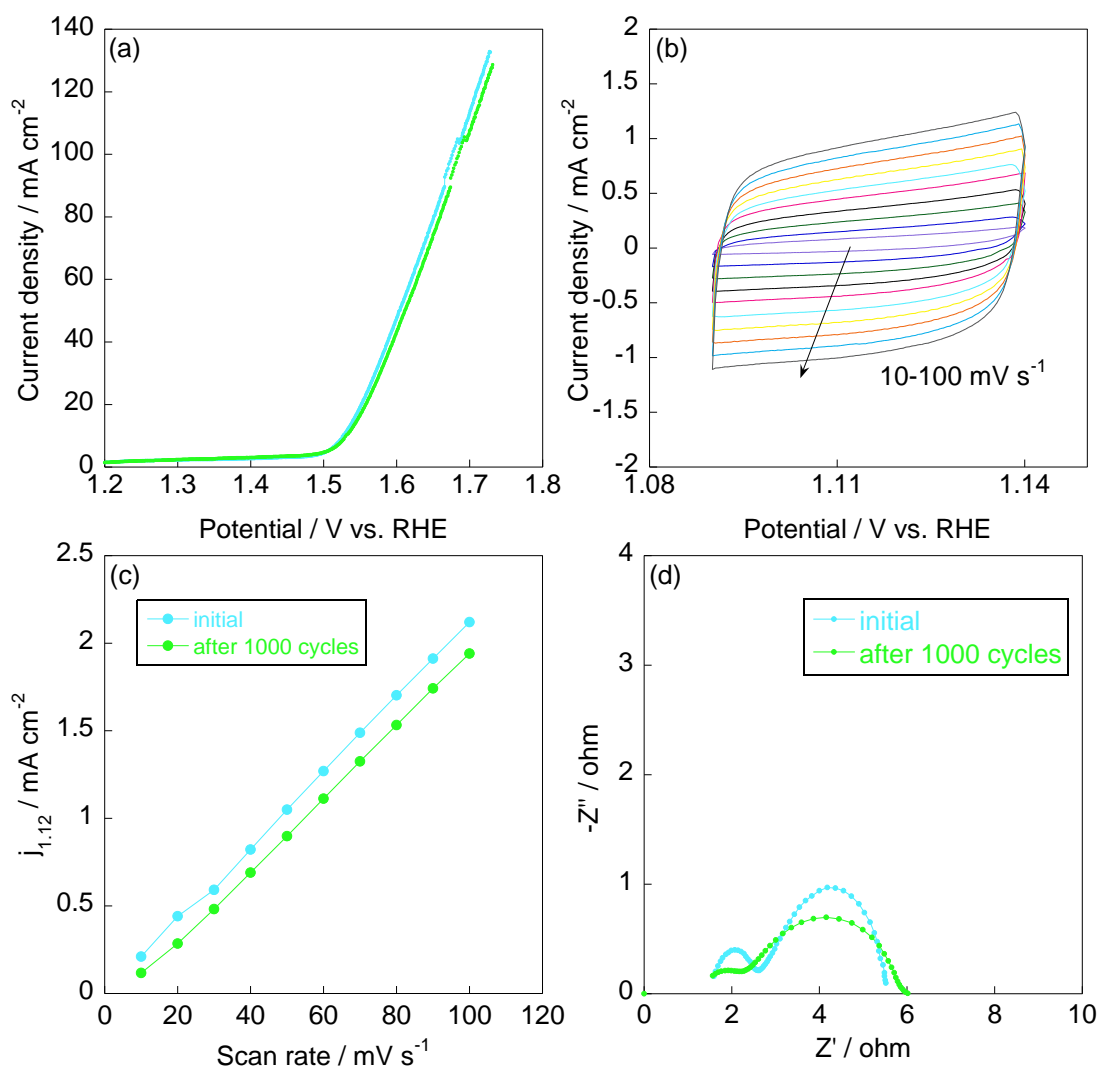

**Figure S10** OER performance (a), cyclic voltammetry curve (b), ECSA (c) and electrochemical impedance spectroscopies (d) of Fe<sub>0.67</sub>Co<sub>0.33</sub>-NR/NCNT before and after 1000 potential cycles.

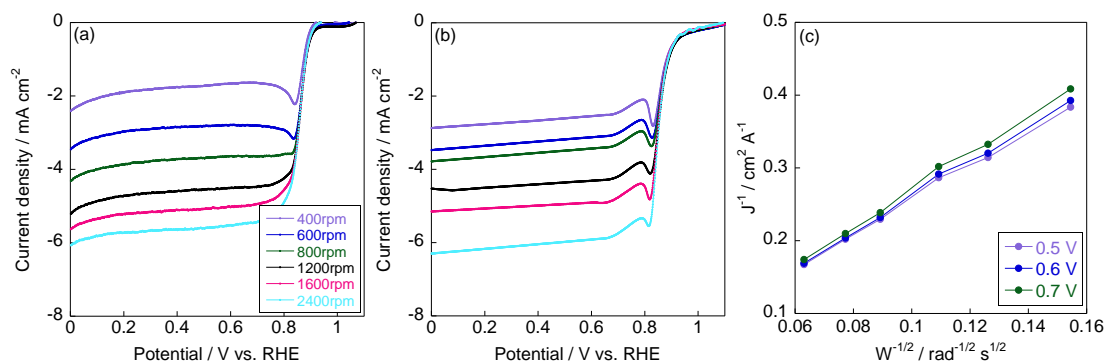

**Figure S11** LSV curves of Fe<sub>0.33</sub>Co<sub>0.67</sub>-NR/NCNT (a) and commercial Pt/C (b) electrocatalysts with various scan speeds. (c) Number of transferred electrons at various potentials for commercial Pt/C electrocatalyst.

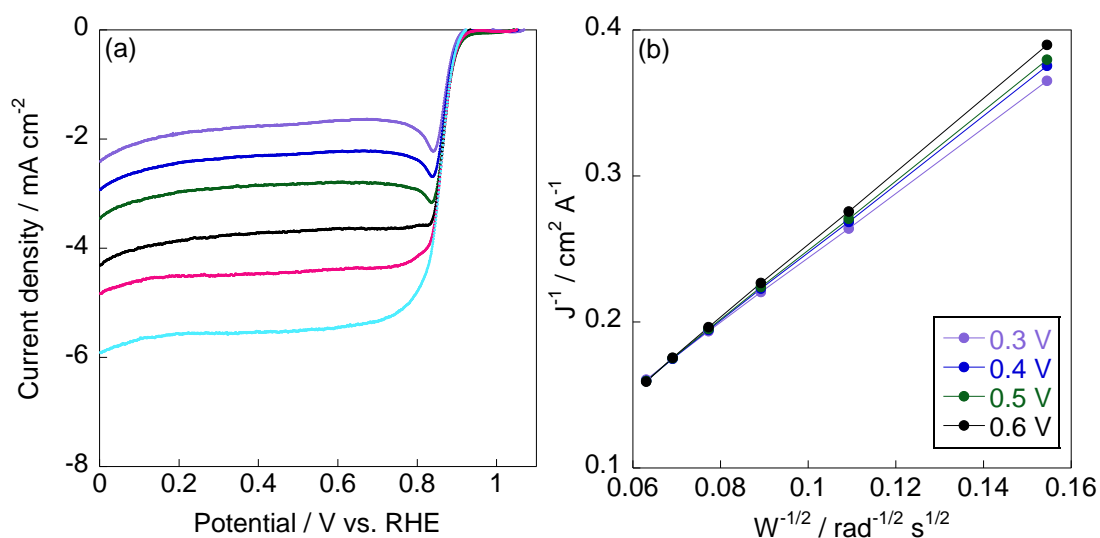

**Figure S12** (a) LSV curves of Fe<sub>0.33</sub>Co<sub>0.67</sub>-NR/NCNT electrocatalyst with various scan speeds after 1000 potential cycles. (b) Number of transferred electrons at various potentials for Fe<sub>0.33</sub>Co<sub>0.67</sub>-NR/NCNT electrocatalyst.

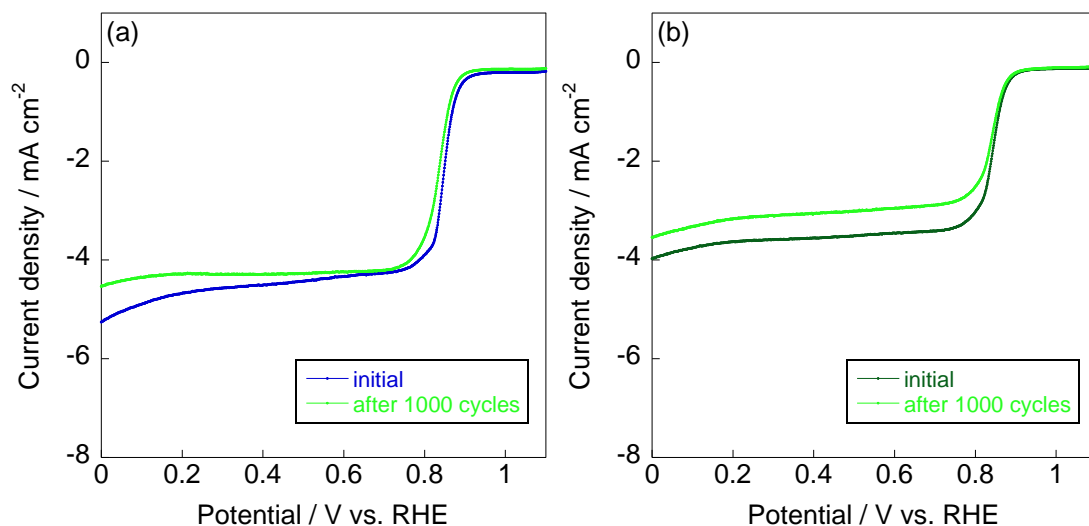

**Figure S13** ORR curves of Fe-NR/NCNT (a) and Co-NR/NCNT electrocatalysts before and after 1000 potential cycles.

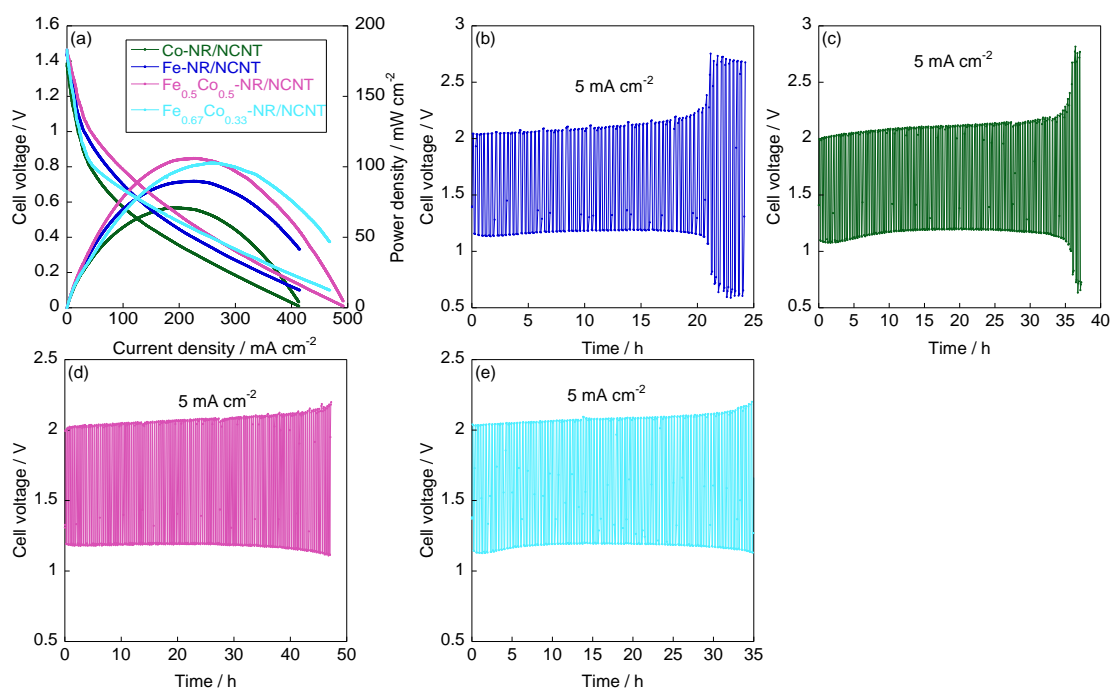

**Figure S14** (a) I-V and power density polarization curves of various electrocatalysts. (b) Charge-discharge polarization curves of Fe-NR/NCNT (b), Co-NR/NCNT (c), Fe<sub>0.5</sub>Co<sub>0.5</sub>-NR/NCNT (d) and Fe<sub>0.67</sub>Co<sub>0.33</sub>-NR/NCNT (e) electrocatalyst.



## References

1. S. Li, C. Cheng, X. Zhao, J. Schmidt and A. Thomas, *Angew. Chem. Int. Ed.*, 2018, **57**, 1856-1862.
2. P. Cai, Y. Hong, S. Ci and Z. Wen, *Nanoscale*, 2016, **8**, 20048-20055.
3. X.-T. Wang, T. Ouyang, L. Wang, J.-H. Zhong, T. Ma and Z.-Q. Liu, *Angew. Chem. Int. Ed.*, 2019, **58**, 13291-13296.
4. X. Liu, L. Wang, P. Yu, C. Tian, F. Sun, J. Ma, W. Li and H. Fu, *Angew. Chem. Int. Ed.*, 2018, **57**, 16166-16170.
5. J.-T. Ren, L. Chen, Y.-S. Wang, W.-W. Tian, L.-J. Gao and Z.-Y. Yuan, *ACS Sustain. Chem. Eng.*, 2020, **8**, 223-237.
6. G. Zhang, X. Liu, L. Wang, F. Sun, Y. Yang, C. Tian, P. Yu, Q. Pan and H. Fu, *ACS Sustain. Chem. Eng.*, 2019, **7**, 19104-19112.
7. L. Wei, L. Qiu, Y. Liu, J. Zhang, D. Yuan and L. Wang, *ACS Sustain. Chem. Eng.*, 2019, **7**, 14180-14188.
8. P. Zhu, J. Gao and S. Liu, *J. Power Sources*, 2020, **449**, 227512.
9. P. Yu, L. Wang, F. Sun, Y. Xie, X. Liu, J. Ma, X. Wang, C. Tian, J. Li and H. Fu, *Adv. Mater.*, 2019, **31**, 1901666.
